# Supplementary material for: A Systematic Framework for Molecular Dynamics Simulations of Protein Post-Translational Modifications
Source: PubMed Central journal article supplement (PMC3715417; doi:10.1371/journal.pcbi.1003154), 2013-07-18
Supplement: pcbi.1003154.s005.pdf [file pcbi.1003154.s005.pdf]

## ENZYMATIC

| # PTM | AA | code | chemical | structure |
|-------|----|------|----------|-----------|
|-------|----|------|----------|-----------|

### Phosphorylation

|    |    |     |                  |                         |                                                                                       |
|----|----|-----|------------------|-------------------------|---------------------------------------------------------------------------------------|
| 1  | 1  | SER | S1P              | phosphoserine (-1)      | 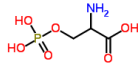   |
| 2  | 2  |     | S2P              | phosphoserine (-2)      |                                                                                       |
| 3  | 3  | THR | T1P              | phosphothreonine (-1)   |    |
| 4  | 4  |     | T2P              | phosphothreonine (-2)   |                                                                                       |
| 5  | 5  | TYR | Y1P              | phosphotyrosine (-1)    |    |
| 6  | 6  |     | Y2P              | phosphotyrosine (-2)    |                                                                                       |
| 7  | 7  | ASP | D1P              | phosphoaspartate (-1)   |    |
| 8  | 8  |     | D2P              | phosphoaspartate (-2)   |                                                                                       |
| 9  | 9  | LYS | K1P <sup>#</sup> | phospholysine (-1)      |  |
| 10 | 10 |     | K2P <sup>#</sup> | phospholysine (-2)      |                                                                                       |
| 11 | 11 | ARG | R0P <sup>#</sup> | phosphoarginine (0)     |  |
| 12 | 12 |     | R1P <sup>#</sup> | phosphoarginine (-1)    |                                                                                       |
| 13 | 13 | HIS | H11              | 1-phosphohistidine (-1) |  |
| 14 | 14 |     | H12              | 1-phosphohistidine (-2) |                                                                                       |
| 15 | 15 | HIS | H31              | 3-phosphohistidine (-1) |  |
| 16 | 16 |     | H32              | 3-phosphohistidine (-2) |                                                                                       |

### Methylation

|    |    |     |     |                      |                                                                                       |
|----|----|-----|-----|----------------------|---------------------------------------------------------------------------------------|
| 17 | 17 | LYS | KMN | N6-methyllysine (0)  | 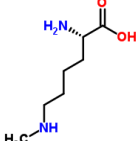 |
| 18 | 18 |     | KMC | N6-methyllysine (+1) |                                                                                       |

|    |    |     |                  |                                  |                                                                                       |
|----|----|-----|------------------|----------------------------------|---------------------------------------------------------------------------------------|
| 19 | 19 | LYS | K2M              | N6,N6-dimethyllysine (0)         | 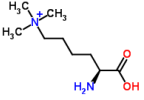   |
| 20 | 20 |     | <b>K2C</b>       | N6,N6-dimethyllysine (+1)        |                                                                                       |
| 21 | 21 | LYS | K3C              | N6,N6,N6-trimethyllysine         |    |
| 22 | 22 | ARG | RMN              | omega-N-methylarginine (0)       |    |
| 23 | 23 |     | <b>RMC</b>       | omega-N-methylarginine (+1)      |                                                                                       |
| 24 | 24 | ARG | RSM              | symmetric-dimethylarginine (0)   |    |
| 25 | 25 |     | <b>RMS</b>       | symmetric-dimethylarginine (+1)  |                                                                                       |
| 26 | 26 | ARG | RAM              | asymmetric-dimethylarginine (0)  |    |
| 27 | 27 |     | <b>RMA</b>       | asymmetric-dimethylarginine (+1) |                                                                                       |
| 28 | 28 | HIS | <b>H1M</b>       | 1-methylhistidine (0)            |   |
| 29 | 29 |     | H1C              | 1-methylhistidine (+1)           |                                                                                       |
| 30 | 30 | HIS | <b>H3M</b>       | 3-methylhistidine (0)            |  |
| 31 | 31 |     | H3C              | 3-methylhistidine (+1)           |                                                                                       |
| 32 | 32 | GLN | QME              | N5-methylglutamine               |  |
| 33 | 33 | ASN | NME              | N4-methylasparagine              |  |
| 34 | 34 | GLU | EME              | glutamate methyl ester           |  |
| 35 | 35 | ASP | DMA <sup>#</sup> | aspartate methyl ester           |  |
| 36 | 36 | CYS | CYM              | S-methylcysteine                 |  |

### Acetylation

|    |    |     |     |                 |                                                                                     |
|----|----|-----|-----|-----------------|-------------------------------------------------------------------------------------|
| 37 | 37 | LYS | KAC | N6-acetyllysine |  |
|----|----|-----|-----|-----------------|-------------------------------------------------------------------------------------|

### Hydroxylation

|    |    |     |     |                            |                                                                                       |
|----|----|-----|-----|----------------------------|---------------------------------------------------------------------------------------|
| 38 | 38 | PRO | PH3 | 3-hydroxyproline (R)       | 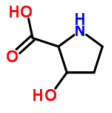   |
| 39 | 39 |     | P3H | 3-hydroxyproline (S)       |                                                                                       |
| 40 | 1* | PRO | HYP | 4-hydroxyproline (R)       |    |
| 41 | 40 |     | HY2 | 4-hydroxyproline (S)       |                                                                                       |
| 42 | 41 | PRO | PHH | 3,4-dihydroxyproline       |    |
| 43 | 42 | LYS | KH5 | 5-hydroxylysine (0,R)      |   |
| 44 | 43 |     | K5H | 5-hydroxylysine (0,S)      |                                                                                       |
| 45 | 44 |     | KPH | 5-hydroxylysine (+1,R)     |                                                                                       |
| 46 | 45 |     | KHP | 5-hydroxylysine (+1,S)     |                                                                                       |
| 47 | 46 | TYR | HTY | 3,4-dihydroxyphenylalanine |  |
| 48 | 47 | TRP | W7H | 7-hydroxytryptophan        |  |
| 49 | 48 | ASP | DH3 | 3-hydroxyaspartate (-1,R)  |  |
| 50 | 49 |     | D3H | 3-hydroxyaspartate (-1,S)  |                                                                                       |
| 51 | 50 |     | DN3 | 3-hydroxyaspartate (0,R)   |                                                                                       |
| 52 | 51 |     | D3N | 3-hydroxyaspartate (0,S)   |                                                                                       |
| 53 | 52 | ASN | N3H | 3-hydroxyasparagine (R)    |  |
| 54 | 53 |     | NH3 | 3-hydroxyasparagine (S)    |                                                                                       |

### Carboxylation

|    |    |     |     |                         |                                                                                       |
|----|----|-----|-----|-------------------------|---------------------------------------------------------------------------------------|
| 55 | 54 | GLU | ECA | 4-carboxyglutamate (-2) | 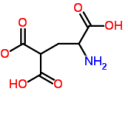 |
| 56 | 55 |     | ECN | 4-carboxyglutamate (-1) |                                                                                       |

### Sulfation

|    |    |     |     |               |                                                                                     |
|----|----|-----|-----|---------------|-------------------------------------------------------------------------------------|
| 57 | 56 | TYR | YSU | sulfotyrosine | 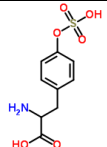 |
|----|----|-----|-----|---------------|-------------------------------------------------------------------------------------|

### Dehydration

|    |    |     |     |                       |                                                                                     |
|----|----|-----|-----|-----------------------|-------------------------------------------------------------------------------------|
| 58 | 57 | SER | SDH | dehydroalanine        |  |
| 59 | 58 | THR | TDH | 2,3-didehydrobutyrine |  |

### Bromidation

|    |    |     |     |                   |                                                                                     |
|----|----|-----|-----|-------------------|-------------------------------------------------------------------------------------|
| 60 | 59 | TRP | WBR | 6-bromotryptophan | 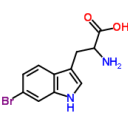 |
|----|----|-----|-----|-------------------|-------------------------------------------------------------------------------------|

### S-nitrosylation

|    |    |     |     |                   |                                                                                       |
|----|----|-----|-----|-------------------|---------------------------------------------------------------------------------------|
| 61 | 60 | CYS | CSN | S-nitrosocysteine | 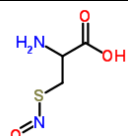 |
|----|----|-----|-----|-------------------|---------------------------------------------------------------------------------------|

### Citrullination

|    |    |     |     |            |                                                                                       |
|----|----|-----|-----|------------|---------------------------------------------------------------------------------------|
| 62 | 61 | ARG | RCI | citrulline | 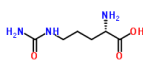 |
|----|----|-----|-----|------------|---------------------------------------------------------------------------------------|

### Allysine formation (the same as carbonylation)

|    |    |     |     |                                      |                                                                                       |
|----|----|-----|-----|--------------------------------------|---------------------------------------------------------------------------------------|
| 63 | 62 | LYS | KAL | allysine (amino adipic semialdehyde) | 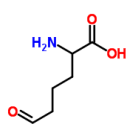 |
|----|----|-----|-----|--------------------------------------|---------------------------------------------------------------------------------------|

### Glycosylation

|    |    |     |     |                                        |                                                                                       |
|----|----|-----|-----|----------------------------------------|---------------------------------------------------------------------------------------|
| 64 | 63 | ASN | NNG | N-acetylglucosamine (N4-linked to ASN) | 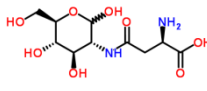 |
|----|----|-----|-----|----------------------------------------|---------------------------------------------------------------------------------------|

## NONENZYMATIC

| # PTM                | AA | Code | chemical         | structure                  |                                                                                       |
|----------------------|----|------|------------------|----------------------------|---------------------------------------------------------------------------------------|
| <b>Hydroxylation</b> |    |      |                  |                            |                                                                                       |
| 65                   | 64 | PHE  | F23 <sup>#</sup> | 2,3-dihydroxyphenylalanine | 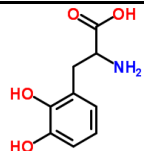   |
| 66                   | 65 | PHE  | F2H <sup>#</sup> | 2-hydroxyphenylalanine     |    |
| 67                   | 66 | PHE  | F3H <sup>#</sup> | 3-hydroxyphenylalanine     |    |
| 68                   | 2* | PHE  | TYR <sup>#</sup> | tyrosine                   |   |
| 69                   | 67 | TRP  | W6H <sup>#</sup> | 6-hydroxytryptophan        |  |
| 70                   | 68 | TRP  | W5H <sup>#</sup> | 5-hydroxytryptophan        |  |
| 71                   | 69 | TRP  | W4H <sup>#</sup> | 4-hydroxytryptophan        |  |
| 72                   | 70 | TRP  | W2H <sup>#</sup> | 2-hydroxytryptophan        |  |
| 73                   | 71 | LEU  | L3H <sup>#</sup> | 3-hydroxyleucine (R)       |  |
| 74                   | 72 |      | LH3 <sup>#</sup> | 3-hydroxyleucine (S)       |                                                                                       |
| 75                   | 73 | LEU  | L4H <sup>#</sup> | 4-hydroxyleucine           |  |

|    |    |     |                  |                        |  |
|----|----|-----|------------------|------------------------|--|
| 76 | 74 | LEU | L5H <sup>#</sup> | 5-hydroxyleucine (R)   |  |
| 77 | 75 |     | LH5 <sup>#</sup> | 5-hydroxyleucine (S)   |  |
| 78 | 76 | VAL | V3H              | 3-hydroxyvaline        |  |
| 79 | 77 | CYS | CYH              | cysteine sulfenic acid |  |
| 80 | 78 | PRO | PH5 <sup>#</sup> | 5-hydroxyproline (R)   |  |
| 81 | 79 |     | P5H <sup>#</sup> | 5-hydroxyproline (S)   |  |

### Carbonylation

|    |    |     |                  |                                      |  |
|----|----|-----|------------------|--------------------------------------|--|
| 63 | 62 | LYS | KAL              | allysine (amino adipic semialdehyde) |  |
| 82 | 80 | PRO | GSA <sup>#</sup> | glutamic semialdehyde                |  |
| 83 |    | ARG |                  |                                      |  |
| 84 | 81 | THR | TOX <sup>#</sup> | 2-amino-3-ketobutyric acid           |  |

### Oxidation

|    |    |     |                  |                    |  |
|----|----|-----|------------------|--------------------|--|
| 85 | 82 | PRO | PGA <sup>#</sup> | pyroglutamic acid  |  |
| 86 | 3* | HIS | ASN              | asparagine         |  |
| 87 | 4* | HIS | ASP              | aspartic acid (-1) |  |
| 88 | 5* |     | ASPH             | aspartic acid (0)  |  |
| 89 | 83 | HIS | H2X <sup>#</sup> | 2-oxo-histidine    |  |

|    |    |     |                  |                          |  |
|----|----|-----|------------------|--------------------------|--|
| 90 | 84 | MET | MSX              | methionine sulfoxide (R) |  |
| 91 | 85 |     | MXS              | methionine sulfoxide (S) |  |
| 92 | 86 | MET | MES              | methionine sulfone       |  |
| 93 | 87 | CYS | CSA              | cysteine sulfinic acid   |  |
| 94 | 88 | CYS | CSE <sup>#</sup> | cysteic acid             |  |

### Nitration

|    |    |     |                    |                      |  |
|----|----|-----|--------------------|----------------------|--|
| 95 | 89 | TYR | YNI                | 3-nitrotyrosine (-1) |  |
| 96 | 90 |     | YNN <sup>HFE</sup> | 3-nitrotyrosine (0)  |  |
|    |    |     | YNB                | 3-nitrotyrosine (0)  |  |
| 97 | 91 | TRP | WNI <sup>#</sup>   | 6-nitrotryptophan    |  |

### Kynurenine formation

|     |    |     |                  |                     |  |
|-----|----|-----|------------------|---------------------|--|
| 98  | 92 | TRP | WKY <sup>#</sup> | kynurenine          |  |
| 99  | 93 | TRP | WKH <sup>#</sup> | 3-hydroxykynurenine |  |
| 100 | 94 | TRP | WKF <sup>#</sup> | formylkynurenine    |  |

### Chlorination

|     |    |     |                  |                |                                                                                     |
|-----|----|-----|------------------|----------------|-------------------------------------------------------------------------------------|
| 101 | 95 | TYR | YCH <sup>#</sup> | chlorotyrosine | 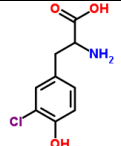 |
|-----|----|-----|------------------|----------------|-------------------------------------------------------------------------------------|

### Deamidation

|     |    |     |            |                    |                                                                                     |
|-----|----|-----|------------|--------------------|-------------------------------------------------------------------------------------|
| 102 | 4* | ASN | <b>ASP</b> | aspartic acid (-1) | 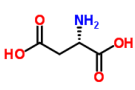 |
| 103 | 5* |     | ASPH       | aspartic acid (0)  |                                                                                     |
| 104 | 6* | GLN | <b>GLU</b> | glutamic acid (-1) |  |
| 105 | 7* |     | GLUH       | glutamic acid (0)  |                                                                                     |

### Carbamylation

|     |    |     |                  |                     |                                                                                       |
|-----|----|-----|------------------|---------------------|---------------------------------------------------------------------------------------|
| 106 | 96 | LYS | KAM <sup>#</sup> | homocitruline       | 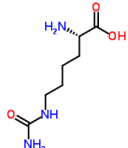  |
| 107 | 97 | LYS | <b>KCA</b>       | carboxyllysine (+1) |  |
| 108 | 98 |     | KCN              | carboxyllysine (0)  |                                                                                       |
| 109 | 99 | CYS | CAM <sup>#</sup> | S-carbamoylcysteine |  |

### Norleucine

|     |     |     |                  |            |                                                                                       |
|-----|-----|-----|------------------|------------|---------------------------------------------------------------------------------------|
| 110 | 100 | LEU | LNO <sup>#</sup> | norleucine | 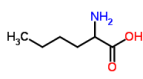 |
| 111 |     | LYS |                  |            |                                                                                       |
| 112 |     | MET |                  |            |                                                                                       |

## N-TERMINAL

| # PTM | AA | Code | chemical | structure |
|-------|----|------|----------|-----------|
|-------|----|------|----------|-----------|

### Methylation

|         |     |     |             |                  |                                                                                       |
|---------|-----|-----|-------------|------------------|---------------------------------------------------------------------------------------|
| 113-132 | 101 | all | 1NM         | N-methyl-AA (0)  | 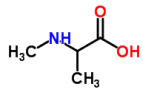 |
| 133-152 | 102 |     | <b>1NM+</b> | N-methyl-AA (+1) |                                                                                       |



|         |     |                  |      |                      |                                                                                     |
|---------|-----|------------------|------|----------------------|-------------------------------------------------------------------------------------|
| 153-171 | 103 | all <sup>+</sup> | 2NM  | N,N-dimethyl-AA (0)  |  |
| 172-191 | 104 |                  | 2NM+ | N,N-dimethyl-AA (+1) |                                                                                     |
| 193-210 | 105 | all <sup>+</sup> | 3NM+ | N,N,N-trimethyl-AA   |  |

### Acetylation

|         |     |     |     |             |                                                                                     |
|---------|-----|-----|-----|-------------|-------------------------------------------------------------------------------------|
| 211-230 | 106 | all | NAC | N-acetyl-AA |  |
|---------|-----|-----|-----|-------------|-------------------------------------------------------------------------------------|

### Pyrrolidone formation

|     |    |     |     |                   |                                                                                     |
|-----|----|-----|-----|-------------------|-------------------------------------------------------------------------------------|
| 231 | 81 | GLN | PGA | pyroglutamic acid | 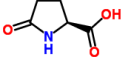 |
| 232 |    | GLU |     |                   |                                                                                     |

### Formylation

|     |     |     |     |                    |                                                                                       |
|-----|-----|-----|-----|--------------------|---------------------------------------------------------------------------------------|
| 233 | 107 | MET | FOR | N-formylmethionine | 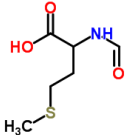 |
|-----|-----|-----|-----|--------------------|---------------------------------------------------------------------------------------|

### Pyruvate formation

|     |     |     |     |              |                                                                                       |
|-----|-----|-----|-----|--------------|---------------------------------------------------------------------------------------|
| 234 | 108 | SER | PYA | pyruvic acid | 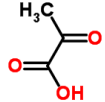 |
| 235 |     | CYS |     |              |                                                                                       |
| 236 |     | VAL |     |              |                                                                                       |

## C-TERMINAL

| # PTM | AA | Code | chemical | structure |
|-------|----|------|----------|-----------|
|-------|----|------|----------|-----------|

### Amidation

|         |     |     |     |          |                                                                                       |
|---------|-----|-----|-----|----------|---------------------------------------------------------------------------------------|
| 237-256 | 109 | all | AMD | AA-amide |  |
|---------|-----|-----|-----|----------|---------------------------------------------------------------------------------------|

## Methylation

|     |     |     |     |                 |                                                                                     |
|-----|-----|-----|-----|-----------------|-------------------------------------------------------------------------------------|
| 257 | 110 | CYS | CME | AA-methyl ester | 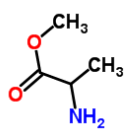 |
| 258 |     | LEU |     |                 |                                                                                     |
| 259 |     | LYS |     |                 |                                                                                     |
