# Supplementary material for: A Systematic Framework for Molecular Dynamics Simulations of Protein Post-Translational Modifications
Source: PubMed Central journal article supplement (PMC3715417; doi:10.1371/journal.pcbi.1003154), 2013-07-18
Supplement: pcbi.1003154.s006.pdf [file pcbi.1003154.s006.pdf]

| Compound                                                           | HFE (kJ/mol) |             |
|--------------------------------------------------------------------|--------------|-------------|
|                                                                    | experimental | ffG45a3     |
| <b>Validation set. PTM-side-chain analogs</b>                      |              |             |
| N-butylacetamide                                                   | -39.0        | -18.9       |
| <i>o</i> -cresol                                                   | -24.6        | -22.5       |
| <i>m</i> -cresol                                                   | -23.0        | -25.9       |
| 2-methyl-2-propanol                                                | -18.7        | -7.2        |
| 2-methyl-1-propanol                                                | -18.8        | -11.7       |
| propan-2-ol                                                        | -19.8        | -8.9        |
| N-methylacetamine                                                  | -41.9        | -18.7       |
| methylpropanoate                                                   | -12.3        | 9.0         |
| methylacetate                                                      | -13.1        | 7.4         |
| dimethylsulfide                                                    | -6.7         | 4.5         |
| butanal                                                            | -13.3        | -7.0        |
| propanal                                                           | -14.4        | -7.0        |
| butane                                                             | 8.7          | 7.6         |
| <b>Validation set. Compounds similar to PTM-side-chain analogs</b> |              |             |
| diethylamine                                                       | -17.0        | -8.8        |
| trimethylamine                                                     | -13.4        | -4.6        |
| ethene                                                             | 5.4          | 13.6        |
| bromobenzene                                                       | -6.1         | 18.0        |
| aniline                                                            | -23.0        | -25.4       |
| acetophenone                                                       | -19.2        | -12.4       |
| N-methylformamide                                                  | -41.9        | -22.0       |
| chlorophenol                                                       | -19.0        | -22.3       |
| 2-nitrophenol                                                      | -19.2        | -36.9       |
| nitrobenzene                                                       | -17.2        | -24.5       |
| acetone                                                            | -16.1        | -3.9        |
| dimethylsulfoxide                                                  | -42.3        | -11.1       |
| methylsulfonylmethane                                              | -42.2        | -15.4       |
| <b>RMSE</b>                                                        | -            | <b>15.0</b> |
