# Supplementary material for: A Systematic Framework for Molecular Dynamics Simulations of Protein Post-Translational Modifications
Source: PubMed Central journal article supplement (PMC3715417; doi:10.1371/journal.pcbi.1003154), 2013-07-18
Supplement: pcbi.1003154.s007.pdf [file pcbi.1003154.s007.pdf]

| <b>PTM (AA)</b> | <b>chemical</b>                 | <b>MW (u)</b> | <b>SASA (nm<sup>2</sup>)</b> | <b>net charge</b> | <b>DM (D)</b> |
|-----------------|---------------------------------|---------------|------------------------------|-------------------|---------------|
| S1P (SER)       | phosphoserine (-1)              | 110.0 (31.0)  | 1.88 (1.20)                  | -1 (0)            | N/A (2.30)    |
| S2P (SER)       | phosphoserine (-2)              | 109.0 (31.0)  | 1.93 (1.20)                  | -2 (0)            | N/A (2.30)    |
| T1P (THR)       | phosphothreonine (-1)           | 124.0 (45.1)  | 2.12 (1.41)                  | -1 (0)            | N/A (2.23)    |
| T2P (THR)       | phosphothreonine (-2)           | 123.0 (45.1)  | 2.15 (1.41)                  | -2 (0)            | N/A (2.23)    |
| Y1P (TYR)       | phosphotyrosine (-1)            | 186.1 (107.1) | 2.81 (2.41)                  | -1 (0)            | N/A (2.06)    |
| Y2P (TYR)       | phosphotyrosine (-2)            | 185.1 (107.1) | 2.73 (2.41)                  | -2 (0)            | N/A (2.06)    |
| D1P (ASP)       | phosphoaspartate (-1)           | 138.0 (58.0)  | 2.23 (1.57)                  | -1 (-1)           | N/A (N/A)     |
| D2P (ASP)       | phosphoaspartate (-2)           | 137.0 (58.0)  | 2.17 (1.57)                  | -2 (-1)           | N/A (N/A)     |
| K1P (LYS)       | phospholysine (-1)              | 151.1 (73.1)  | 2.59 (1.92)                  | -1 (1)            | N/A (N/A)     |
| K2P (LYS)       | phospholysine (-2)              | 150.1 (73.1)  | 2.54 (1.92)                  | -2 (1)            | N/A (N/A)     |
| R0P (ARG)       | phosphoarginine (0)             | 180.1 (101.2) | 2.82 (2.21)                  | 0 (1)             | 14.65 (N/A)   |
| R1P (ARG)       | phosphoarginine (-1)            | 179.1 (101.2) | 2.73 (2.21)                  | -1 (1)            | N/A (N/A)     |
| H11 (HIS)       | 1-phosphohistidine (-1)         | 160.1 (81.1)  | 2.36 (1.91)                  | -1 (0)            | N/A (6.43)    |
| H12 (HIS)       | 1-phosphohistidine (-2)         | 159.1 (81.1)  | 2.39 (1.91)                  | -2 (0)            | N/A (6.43)    |
| H31 (HIS)       | 3-phosphohistidine (-1)         | 160.1 (81.1)  | 2.51 (1.91)                  | -1 (0)            | N/A (6.43)    |
| H32 (HIS)       | 3-phosphohistidine (-2)         | 159.1 (81.1)  | 2.53 (1.91)                  | -2 (0)            | N/A (6.43)    |
| KMN (LYS)       | N6-methyllysine (0)             | 86.2 (73.1)   | 2.40 (1.92)                  | 0 (1)             | 1.84 (N/A)    |
| KMC (LYS)       | N6-methyllysine (+1)            | 87.2 (73.1)   | 2.26 (1.92)                  | 1 (1)             | N/A (N/A)     |
| K2M (LYS)       | N6,N6-dimethyllysine (0)        | 100.2 (73.1)  | 2.72 (1.92)                  | 0 (1)             | 1.58 (N/A)    |
| K2C (LYS)       | N6,N6-dimethyllysine (+1)       | 101.2 (73.1)  | 2.45 (1.92)                  | 1 (1)             | N/A (N/A)     |
| K3C (LYS)       | N6,N6,N6-trimethyllysine        | 115.2 (73.1)  | 2.68 (1.92)                  | 1 (1)             | N/A (N/A)     |
| RMN (ARG)       | omega-N-methylarginine (0)      | 114.2 (101.2) | 2.38 (2.21)                  | 0 (1)             | 2.78 (N/A)    |
| RMC (ARG)       | omega-N-methylarginine (+1)     | 115.2 (101.2) | 2.43 (2.21)                  | 1 (1)             | N/A (N/A)     |
| RSM (ARG)       | symmetric-dimethylarginine (0)  | 128.2 (101.2) | 2.80 (2.21)                  | 0 (1)             | 0.94 (N/A)    |
| RMS (ARG)       | symmetric-dimethylarginine (+1) | 129.2 (101.2) | 2.69 (2.21)                  | 1 (1)             | N/A (N/A)     |

|           |                                  |               |             |         |             |
|-----------|----------------------------------|---------------|-------------|---------|-------------|
| RAM (ARG) | asymmetric-dimethylarginine (0)  | 128.2 (101.2) | 2.62 (2.21) | 0 (1)   | 3.55 (N/A)  |
| RMA (ARG) | asymmetric-dimethylarginine (+1) | 129.2 (101.2) | 2.69 (2.21) | 1 (1)   | N/A (N/A)   |
| H1M (HIS) | 1-methylhistidine (0)            | 95.1 (81.1)   | 2.24 (1.91) | 0 (0)   | 6.10 (6.43) |
| H1C (HIS) | 1-methylhistidine (+1)           | 96.1 (81.1)   | 2.19 (1.91) | 1 (0)   | N/A (6.43)  |
| H3M (HIS) | 3-methylhistidine (0)            | 95.1 (81.1)   | 2.32 (1.91) | 0 (0)   | 4.33 (6.43) |
| H3C (HIS) | 3-methylhistidine (+1)           | 96.1 (81.1)   | 2.01 (1.91) | 1 (0)   | N/A (6.43)  |
| QME (GLN) | N5-methylglutamine               | 86.1 (72.1)   | 2.07 (1.80) | 0 (0)   | 2.28 (4.94) |
| NME (ASN) | N4-methylasparagine              | 72.1 (58.1)   | 1.97 (1.56) | 0 (0)   | 4.14 (4.90) |
| EME (GLU) | glutamate methyl ester           | 87.1 (72.1)   | 1.99 (1.79) | 0 (-1)  | 5.27 (N/A)  |
| DMA (ASP) | aspartate methyl ester           | 73.1 (58.0)   | 1.80 (1.57) | 0 (-1)  | 5.31 (N/A)  |
| CYM (CYS) | S-methylcysteine                 | 61.1 (47.1)   | 1.65 (1.41) | 0 (0)   | 2.74 (1.84) |
| KAC (LYS) | N6-acetyllysine                  | 114.2 (73.1)  | 2.67 (1.92) | 0 (1)   | 4.12 (N/A)  |
| PH3 (PRO) | 3-hydroxyproline (R)             | 58.1 (42.1)   | 1.61 (1.59) | 0 (0)   | 2.32 (N/A)  |
| P3H (PRO) | 3-hydroxyproline (S)             | 58.1 (42.1)   | 1.64 (1.59) | 0 (0)   | 2.27 (N/A)  |
| HYP (PRO) | 4-hydroxyproline (R)             | 58.1 (42.1)   | 1.77 (1.59) | 0 (0)   | 2.14 (N/A)  |
| HY2 (PRO) | 4-hydroxyproline (S)             | 58.1 (42.1)   | 1.67 (1.59) | 0 (0)   | 2.20 (N/A)  |
| PHH (PRO) | 3,4-dihydroxyproline             | 74.1 (42.1)   | 1.76 (1.59) | 0 (0)   | 3.66 (N/A)  |
| KH5 (LYS) | 5-hydroxylysine (0,R)            | 88.1 (73.1)   | 2.03 (1.92) | 0 (1)   | 3.62 (N/A)  |
| K5H (LYS) | 5-hydroxylysine (0,S)            | 88.1 (73.1)   | 2.17 (1.92) | 0 (1)   | 5.86 (N/A)  |
| KPH (LYS) | 5-hydroxylysine (+1,R)           | 89.1 (73.1)   | 2.05 (1.92) | 1 (1)   | N/A (N/A)   |
| KHP (LYS) | 5-hydroxylysine (+1,S)           | 89.1 (73.1)   | 2.03 (1.92) | 1 (1)   | N/A (N/A)   |
| HTY (TYR) | 3,4-dihydroxyphenylalanine       | 123.1 (107.1) | 2.29 (2.41) | 0 (0)   | 3.97 (2.06) |
| W7H (TRP) | 7-hydroxytryptophan              | 146.2 (130.2) | 2.70 (2.63) | 0 (0)   | 3.19 (3.65) |
| DH3 (ASP) | 3-hydroxyaspartate (-1,R)        | 74.0 (58.0)   | 1.52 (1.57) | -1 (-1) | N/A (N/A)   |
| D3H (ASP) | 3-hydroxyaspartate (-1,S)        | 74.0 (58.0)   | 1.57 (1.57) | -1 (-1) | N/A (N/A)   |
| DN3 (ASP) | 3-hydroxyaspartate (0,R)         | 75.0 (58.0)   | 1.61 (1.57) | 0 (-1)  | 0.58 (N/A)  |

|           |                                      |               |             |         |             |
|-----------|--------------------------------------|---------------|-------------|---------|-------------|
| D3N (ASP) | 3-hydroxyaspartate (0,S)             | 75.0 (58.0)   | 1.56 (1.57) | 0 (-1)  | 3.79 (N/A)  |
| N3H (ASN) | 3-hydroxyasparagine (R)              | 74.1 (58.1)   | 1.71 (1.56) | 0 (0)   | 3.34 (4.90) |
| NH3 (ASN) | 3-hydroxyasparagine (S)              | 74.1 (58.1)   | 1.84 (1.56) | 0 (0)   | 6.30 (4.90) |
| ECA (GLU) | 4-carboxyglutamate (-2)              | 115.1 (72.1)  | 2.06 (1.79) | -2 (-1) | N/A (N/A)   |
| ECN (GLU) | 4-carboxyglutamate (-1)              | 116.1 (72.1)  | 2.20 (1.79) | -1 (-1) | N/A (N/A)   |
| YSU (TYR) | sulfotyrosine                        | 186.2 (107.1) | 2.66 (2.41) | -1 (0)  | N/A (2.06)  |
| SDH (SER) | dehydroalanine                       | 14.0 (31.0)   | 1.06 (1.20) | 0 (0)   | 0.00 (2.30) |
| TDH (THR) | 2,3-didehydrobutyrine                | 28.1 (45.1)   | 1.39 (1.41) | 0 (0)   | 0.00 (2.23) |
| WBR (TRP) | 6-bromotryptophan                    | 209.1 (130.2) | 2.88 (2.63) | 0 (0)   | 3.16 (3.65) |
| CSN (CYS) | S-nitrosocysteine                    | 76.1 (47.1)   | 1.71 (1.41) | 0 (0)   | 3.15 (1.84) |
| RCI (ARG) | citrulline                           | 101.1 (101.2) | 2.22 (2.21) | 0 (1)   | 5.21 (N/A)  |
| KAL (LYS) | allysine (amino adipic semialdehyde) | 71.1 (73.1)   | 2.04 (1.92) | 0 (1)   | 2.96 (N/A)  |
| NNG (ASN) | N-acetylglucosamine                  | 261.3 (58.1)  | 3.73 (1.56) | 0 (0)   | 9.10 (4.90) |
| F23 (PHE) | 2,3-dihydroxyphenylalanine           | 123.1 (91.1)  | 2.29 (2.28) | 0 (0)   | 4.55 (0.74) |
| F2H (PHE) | 2-hydroxyphenylalanine               | 107.1 (91.1)  | 2.13 (2.28) | 0 (0)   | 3.11 (0.74) |
| F3H (PHE) | 3-hydroxyphenylalanine               | 107.1 (91.1)  | 2.08 (2.28) | 0 (0)   | 2.73 (0.74) |
| TYR (PHE) | tyrosine                             | 107.1 (91.1)  | 2.41 (2.28) | 0 (0)   | 2.06 (0.74) |
| W6H (TRP) | 6-hydroxytryptophan                  | 146.2 (130.2) | 2.75 (2.63) | 0 (0)   | 1.32 (3.65) |
| W5H (TRP) | 5-hydroxytryptophan                  | 146.2 (130.2) | 2.71 (2.63) | 0 (0)   | 3.46 (3.65) |
| W4H (TRP) | 4-hydroxytryptophan                  | 146.2 (130.2) | 2.71 (2.63) | 0 (0)   | 4.88 (3.65) |
| W2H (TRP) | 2-hydroxytryptophan                  | 146.2 (130.2) | 2.73 (2.63) | 0 (0)   | 5.19 (3.65) |
| L3H (LEU) | 3-hydroxyleucine (R)                 | 73.1 (57.1)   | 1.96 (1.88) | 0 (0)   | 2.23 (0.00) |
| LH3 (LEU) | 3-hydroxyleucine (S)                 | 73.1 (57.1)   | 1.86 (1.88) | 0 (0)   | 2.25 (0.00) |
| L4H (LEU) | 4-hydroxyleucine                     | 73.1 (57.1)   | 1.92 (1.88) | 0 (0)   | 2.19 (0.00) |
| L5H (LEU) | 5-hydroxyleucine (R)                 | 73.1 (57.1)   | 1.98 (1.88) | 0 (0)   | 2.17 (0.00) |
| LH5 (LEU) | 5-hydroxyleucine (S)                 | 73.1 (57.1)   | 2.01 (1.88) | 0 (0)   | 2.19 (0.00) |

|           |                            |               |             |        |             |
|-----------|----------------------------|---------------|-------------|--------|-------------|
| V3H (VAL) | 3-hydroxyvaline            | 59.1 (43.1)   | 1.70 (1.55) | 0 (0)  | 2.30 (0.00) |
| CYH (CYS) | cysteine sulfenic acid     | 63.1 (47.1)   | 1.62 (1.41) | 0 (0)  | 2.38 (1.84) |
| PH5 (PRO) | 5-hydroxyproline (R)       | 58.1 (42.1)   | 1.69 (1.59) | 0 (0)  | 2.21 (N/A)  |
| P5H (PRO) | 5-hydroxyproline (S)       | 58.1 (42.1)   | 1.79 (1.59) | 0 (0)  | 2.17 (N/A)  |
| GSA (PRO) | glutamic semialdehyde      | 57.1 (42.1)   | 1.64 (1.59) | 0 (0)  | 2.95 (N/A)  |
| GSA (ARG) | glutamic semialdehyde      | 57.1 (101.2)  | 1.64 (2.21) | 0 (1)  | 2.95 (N/A)  |
| TOX (THR) | 2-amino-3-ketobutyric acid | 43.0 (45.1)   | 1.40 (1.41) | 0 (0)  | 2.66 (2.23) |
| PGA (PRO) | pyroglutamic acid          | 56.1 (42.1)   | 1.74 (1.59) | 0 (0)  | 2.65 (N/A)  |
| ASN (HIS) | asparagine                 | 58.1 (81.1)   | 1.56 (1.91) | 0 (0)  | 4.90 (6.43) |
| ASP (HIS) | aspartic acid (-1)         | 58.0 (81.1)   | 1.57 (1.91) | -1 (0) | N/A (6.43)  |
| H2X (HIS) | 2-oxo-histidine            | 95.1 (81.1)   | 2.00 (1.91) | 0 (0)  | 9.64 (6.43) |
| MSX (MET) | methionine sulfoxide (R)   | 91.2 (75.2)   | 2.02 (1.94) | 0 (0)  | 4.27 (2.62) |
| MXS (MET) | methionine sulfoxide (S)   | 91.2 (75.2)   | 2.11 (1.94) | 0 (0)  | 4.23 (2.62) |
| MES (MET) | methionine sulfone         | 107.2 (75.2)  | 2.14 (1.94) | 0 (0)  | 6.80 (2.62) |
| CSA (CYS) | cysteine sulfinic acid     | 78.1 (47.1)   | 1.69 (1.41) | -1 (0) | N/A (1.84)  |
| CSE (CYS) | cysteic acid               | 94.1 (47.1)   | 1.80 (1.41) | -1 (0) | N/A (1.84)  |
| YNI (TYR) | 3-nitrotyrosine (-1)       | 151.1 (107.1) | 2.61 (2.41) | -1 (0) | N/A (2.06)  |
| YNN (TYR) | 3-nitrotyrosine (0)        | 152.1 (107.1) | 2.62 (2.41) | 0 (0)  | 5.44 (2.06) |
| YNB (TYR) | 3-nitrotyrosine (0)        | 152.1 (107.1) | 2.62 (2.41) | 0 (0)  | 3.83 (2.06) |
| WNI (TRP) | 6-nitrotryptophan          | 175.2 (130.2) | 3.06 (2.63) | 0 (0)  | 3.08 (3.65) |
| WKY (TRP) | kynurenine                 | 134.2 (130.2) | 2.60 (2.63) | 0 (0)  | 4.16 (3.65) |
| WKH (TRP) | 3-hydroxykynurenine        | 150.2 (130.2) | 2.66 (2.63) | 0 (0)  | 2.78 (3.65) |
| WKF (TRP) | formylkynurenine           | 162.2 (130.2) | 2.98 (2.63) | 0 (0)  | 3.03 (3.65) |
| YCH (TYR) | chlorotyrosine             | 141.6 (107.1) | 2.44 (2.41) | 0 (0)  | 3.43 (2.06) |
| ASP (ASN) | aspartic acid (-1)         | 58.0 (58.1)   | 1.57 (1.56) | -1 (0) | N/A (4.90)  |
| GLU (GLN) | glutamic acid (-1)         | 72.1 (72.1)   | 1.79 (1.80) | -1 (0) | N/A (4.94)  |

|           |                     |              |             |        |             |
|-----------|---------------------|--------------|-------------|--------|-------------|
| KAM (LYS) | homocitruline       | 115.2 (73.1) | 2.46 (1.92) | 0 (1)  | 5.24 (N/A)  |
| KCA (LYS) | carboxylysine (+1)  | 115.1 (73.1) | 2.48 (1.92) | -1 (1) | N/A (N/A)   |
| KCN (LYS) | carboxylysine (0)   | 116.1 (73.1) | 2.49 (1.92) | 0 (1)  | 3.63 (N/A)  |
| CAM (CYS) | S-carbamoylcysteine | 90.1 (47.1)  | 1.99 (1.41) | 0 (0)  | 4.81 (1.84) |
| LNO (LEU) | norleucine          | 57.1 (57.1)  | 1.88 (1.88) | 0 (0)  | 0.00 (0.00) |
| LNO (LYS) | norleucine          | 57.1 (73.1)  | 1.88 (1.92) | 0 (1)  | 0.00 (N/A)  |
| LNO (MET) | norleucine          | 57.1 (75.2)  | 1.88 (1.94) | 0 (0)  | 0.00 (2.62) |
